# Supplementary material for: Effect of thiophene/furan substitution on organic field effect transistor properties of arylthiadiazole based organic semiconductors
Source: Royal Society of Chemistry journal article supplement (doi:10.1039/d0tc04982d), 2020-01-01
Supplement: d0tc04982d1.pdf [file d0tc04982d1.pdf]

## Supporting Information

### Effect of thiophene/furan substitutions on organic field effect transistor properties of arylthiadiazole based organic semiconductors

Anna Pachariyangkun,<sup>a</sup> Masayuki Suda,<sup>b</sup> Sarinya Hadsadee,<sup>c</sup> Siriporn Jungsuttiwong,<sup>c</sup> Phattananawee Nalaoh,<sup>a</sup> Pichaya Pattanasattayavong,<sup>a</sup> Taweesak Sudyoosuk,<sup>a</sup> Hiroshi M. Yamamoto,<sup>\*b</sup> and Vinich Promarak<sup>\*ad</sup>

<sup>a</sup> Department of Materials Science and Engineering, School of Molecular Science and Engineering, Vidyasirimedhi Institute of Science and Technology, Wangchan, Rayong 21210, Thailand.

<sup>b</sup> Institute for Molecular Science, Myodaiji, Okazaki 444-8585, Japan.

<sup>c</sup> Department of Chemistry and Center of Excellence for Innovation in Chemistry, Faculty of Science, Ubon Ratchathani University, Warinchumrap, Ubon Ratchathani 34190, Thailand.

<sup>d</sup> Research Network of NANOTEC-VISTEC on Nanotechnology for Energy, Vidyasirimedhi Institute of Science and Technology, Wangchan, Rayong 21210, Thailand.

#### Material Synthesis and Characterizations:

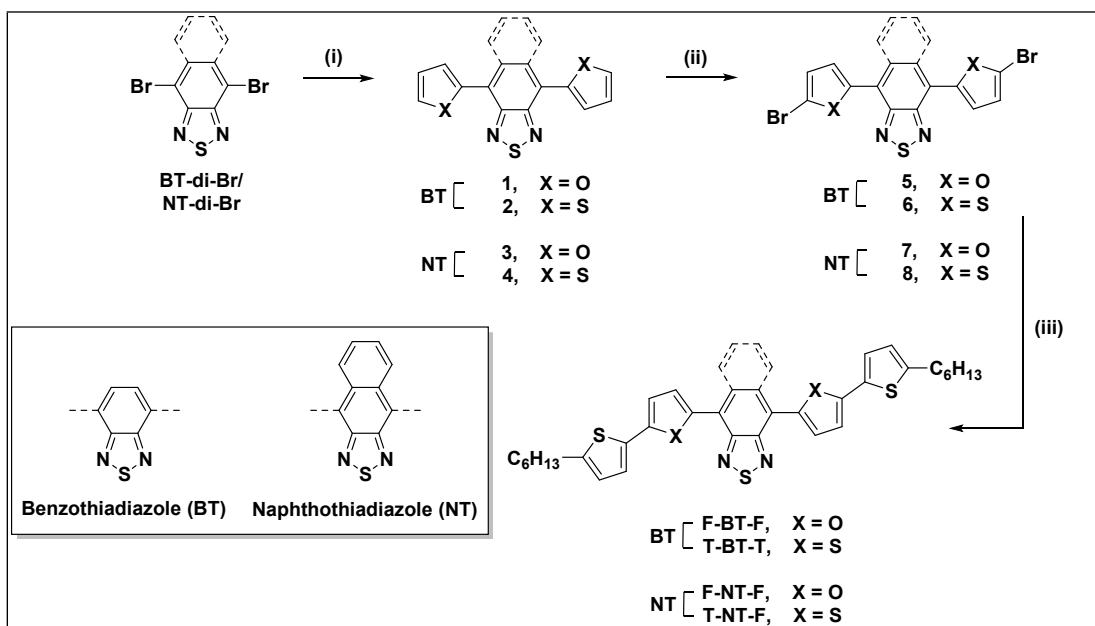

**Scheme S1.** Synthesis route to **F-BT-F**, **T-BT-T**, **F-NT-F**, and **T-NT-T**. Reagents and conditions: (i) 2-thiophene boronic acid or 2-furyl boronic acid, Pd(PPh<sub>3</sub>)<sub>4</sub>, 2M Na<sub>2</sub>CO<sub>3</sub>, THF, 65 °C, 24 h. (ii) N-bromosuccinimide (NBS) in THF, RT, 12 h. (iii) 5-hexyl-2-thiophene boronic acid pinacol ester, Pd(PPh<sub>3</sub>)<sub>4</sub>, 2M Na<sub>2</sub>CO<sub>3</sub>, THF, 65 °C, 24 h.

**Synthesis of 1:** **BT-di-Br** (500 mg, 1.7 mmol), 2-furylboronic acid (475 mg, 4.3 mmol), Pd(PPh<sub>3</sub>)<sub>4</sub> (98 mg, 0.08 mmol), and 2M Na<sub>2</sub>CO<sub>3</sub> (30 mL) were added into a 250 mL round-bottom flask. THF (30 mL) was added as a solvent then the mixture was stirred and degassed with N<sub>2</sub> for 5 min. The mixture was stirred at reflux under N<sub>2</sub> for 24 h. After cooling, the mixture was extracted with dichloromethane (80 mL x 2).

The combined organic phase was washed with water (80 mL), brine solution (80 mL), dried over anhydrous Na<sub>2</sub>SO<sub>4</sub>, filtered and evaporated to dryness. To obtain a product of higher purity, the residue was further purified by silica column chromatography eluting with mixture of dichloromethane and hexane (1:6) to obtain orange solid (76.8%). <sup>1</sup>H NMR (600 MHz, CDCl<sub>3</sub>) δ ppm: 8.07 (s, 2H), 7.71 (d, *J* = 2.70 Hz, 2H), 7.61 (s, 2H), 6.65 (t, *J* = 1.32 Hz, 2H); <sup>13</sup>C NMR (151 MHz, CDCl<sub>3</sub>) δ 151.36, 150.17, 142.81, 123.54, 121.83, 112.48, 112.16; HRMS (APCI): calcd. for C<sub>14</sub>H<sub>8</sub>N<sub>2</sub>O<sub>2</sub>S [M + H]<sup>+</sup> 269.0385; found 268.9409.

**Synthesis of 2: BT-di-Br** (500 mg, 1.7 mmol), 2-thiophene boronic acid (543 mg, 4.3 mmol), Pd(PPh<sub>3</sub>)<sub>4</sub> (98 mg, 0.08 mmol), and 2M Na<sub>2</sub>CO<sub>3</sub> (30 mL) were added into a 250 mL round-bottom flask. THF (30 mL) was added as a solvent then the mixture was stirred and degassed with N<sub>2</sub> for 5 min. The mixture was stirred at reflux under N<sub>2</sub> for 24 h. After cooling, the mixture was extracted with dichloromethane (80 mL x 2). The combined organic phase was washed with water (80 mL), brine solution (80 mL), dried over anhydrous Na<sub>2</sub>SO<sub>4</sub>, filtered and evaporated to dryness. The residue was further purified by silica column chromatography eluting with mixture of dichloromethane and hexane (1:5) to obtain orange solid (86.8%). <sup>1</sup>H NMR (600 MHz, CDCl<sub>3</sub>) δ ppm: 8.12 (d, *J* = 2.88 Hz, 2H), 7.87 (s, 2H), 7.45 (d, *J* = 4.86 Hz, 2H), 7.25 (s, 2H), 7.21 (t, *J* = 4.08 Hz, 2H); <sup>13</sup>C NMR (151 MHz, CDCl<sub>3</sub>) δ 152.68, 139.37, 128.01, 127.53, 126.80, 126.05, 125.81; HRMS (APCI): calcd. for C<sub>14</sub>H<sub>8</sub>N<sub>2</sub>S<sub>3</sub> [M + H]<sup>+</sup> 300.9928; found 300.8940.

**Synthesis of 3: NT-di-Br** (200 mg, 0.58 mmol), 2-furyl boronic acid (143 mg, 1.28 mmol), Pd(PPh<sub>3</sub>)<sub>4</sub> (34 mg, 0.03 mmol), and 2M Na<sub>2</sub>CO<sub>3</sub> (4.37 mL) were added into a 100 mL round-bottom flask. THF (25 mL) was added as a solvent then the mixture was stirred and degassed with N<sub>2</sub> for 5 min. The mixture was stirred at reflux under N<sub>2</sub> for 24 h. After cooling, the mixture was extracted with dichloromethane (70 mL x 2). The combined organic phase was washed with water (70 mL), brine solution (70 mL), dried over anhydrous Na<sub>2</sub>SO<sub>4</sub>, filtered and evaporated to dryness. The residue was further purified by silica column chromatography eluting with mixture of dichloromethane and hexane (1:2.5) to obtain purple solid (60.3%). <sup>1</sup>H NMR (600 MHz, CDCl<sub>3</sub>) δ ppm: 8.61 (dd, *J* = 7.14 Hz, 2.88 Hz, 2H), 7.81 (2, 2H), 7.48 (dd, *J* = 7.2 Hz, 2.82 Hz, 2H), 7.35 (d, *J* = 2.64 Hz, 2H), 6.77 (s, 2H); <sup>13</sup>C NMR (151 MHz, CDCl<sub>3</sub>) δ 150.71, 149.84, 143.59, 131.75, 127.39, 127.03, 119.24, 114.97, 111.93; HRMS (APCI): calcd. for C<sub>18</sub>H<sub>10</sub>N<sub>2</sub>O<sub>2</sub>S [M + H]<sup>+</sup> 319.0541; found 319.0620.

**Synthesis of 4: NT-di-Br** (200 mg, 0.58 mmol), 2-thiophene boronic acid (164 mg, 1.28 mmol), Pd(PPh<sub>3</sub>)<sub>4</sub> (34 mg, 0.03 mmol), and 2M Na<sub>2</sub>CO<sub>3</sub> (4.37 mL) were added into a 100 mL round-bottom flask. THF (25 mL) was added as a solvent then the mixture was stirred and degassed with N<sub>2</sub> for 5 min. The mixture was stirred at reflux under N<sub>2</sub> for 24 h. After cooling, the mixture was extracted with dichloromethane (70 mL x 2). The combined organic phase was washed with water (70 mL), brine solution (70 mL), dried over anhydrous Na<sub>2</sub>SO<sub>4</sub>, filtered and evaporated to dryness. The residue was further purified by silica column chromatography eluting with mixture of dichloromethane and hexane (1:2.5) to obtain dark purple solid (80.3%). <sup>1</sup>H NMR (600 MHz, CDCl<sub>3</sub>) δ ppm: 8.30 (dd, *J* = 6.9 Hz, 3.0 Hz, 2H), 7.68 (dd, *J* = 6.9 Hz, 3.0 Hz, 2H), 7.47 (dd, *J* = 3.6 Hz, 1.2 Hz, 2H), 7.43 (dd, *J* = 6.9 Hz, 3.0 Hz, 2H), 7.34 (dd, *J* = 5.1 Hz, 3.3 Hz, 2H); <sup>13</sup>C NMR (151 MHz, CDCl<sub>3</sub>) δ 151.73, 136.41, 132.99, 130.45, 127.91, 127.26, 127.00, 126.97, 123.58; HRMS (APCI): calcd. for C<sub>18</sub>H<sub>10</sub>N<sub>2</sub>S<sub>3</sub> [M + H]<sup>+</sup> 351.0084; found 351.0134.

**Synthesis of 5: 1** (200 mg, 0.75 mmol) was added into a 100 mL round bottom flask. THF (15 mL) was added as solvent. NBS (332 mg, 1.86 mmol) was added to the reaction. The reaction was stirred under N<sub>2</sub> atmosphere for 12 h. After completing, sodium thiosulphate was added to the mixture to remove excess bromine. The reaction was extracted with dichloromethane (50 mL x 2). The combined organic phase was washed with water (50 mL x 3), dried over anhydrous Na<sub>2</sub>SO<sub>4</sub>, filtered, and evaporated to dryness. To

obtain a product with higher purity, the residue was further purified by column chromatography eluting with mixture of dichloromethane and hexane (1:3) to obtain yellow solid (41.1%).  $^1\text{H}$  NMR (600 MHz,  $\text{CDCl}_3$ )  $\delta$  ppm: 7.92 (s, 2H), 7.57 (s, 2H), 6.47 (s, 2H);  $^{13}\text{C}$  NMR (151 MHz,  $\text{CDCl}_3$ )  $\delta$  ppm: 152.02, 150.80, 123.37, 123.24, 120.95, 114.80, 114.36; HRMS (APCI): calcd. for  $\text{C}_{14}\text{H}_6\text{Br}_2\text{N}_2\text{O}_2\text{S}$  [ $\text{M} + \text{H}$ ] $^+$  426.8575; found 426.7498.

**Synthesis of 6: 2** (100 mg, 0.33 mmol) was added into a 50 mL round bottom flask. THF (10 mL) was added as a solvent. NBS (147 mg, 0.83 mmol) was added to the reaction. The reaction was stirred under  $\text{N}_2$  atmosphere for 12 h. After completing, excess bromine was removed by sodium thiosulphate then the reaction was extracted with dichloromethane (70 mL x 2). The combined organic phase was washed with water (70 mL x 2), dried over anhydrous  $\text{Na}_2\text{SO}_4$ , filtered, and evaporated to dryness. To obtain a product with higher purity, the residue was further purified by column chromatography eluting with mixture of dichloromethane and hexane (1:5) to obtain orange solid (63.6%).  $^1\text{H}$  NMR (600 MHz,  $\text{CDCl}_3$ )  $\delta$  ppm: 7.92 (d,  $J = 3.84$ , 2H), 7.71 (s, 2H), 7.08 (d,  $J = 3.84$ , 2H);  $^{13}\text{C}$  NMR (151 MHz,  $\text{CDCl}_3$ )  $\delta$  ppm: 152.30, 140.65, 130.81, 127.37, 125.43, 125.12, 114.80; HRMS (APCI): calcd. for  $\text{C}_{14}\text{H}_6\text{Br}_2\text{N}_2\text{S}_3$  [ $\text{M} + \text{H}$ ] $^+$  458.8039; found 458.6950.

**Synthesis of 7: 3** (111 mg, 0.35 mmol) was added into a 100 mL round bottom flask. THF (15 mL) was added as solvent. NBS (155 mg, 0.87 mmol) was added to the reaction. The reaction was stirred under  $\text{N}_2$  atmosphere for 12 h. After completing, sodium thiosulphate was added to remove excess bromine then the reaction was extracted with dichloromethane (50 mL x 2). The combined organic phase was washed with water (50 mL x 3), dried over anhydrous  $\text{Na}_2\text{SO}_4$ , filtered, and evaporated to dryness. The residue was further purified by column chromatography eluting with mixture of dichloromethane and hexane (1:4) to obtain purple solid (46.9%).  $^1\text{H}$  NMR (600 MHz,  $\text{CDCl}_3$ )  $\delta$  ppm: 8.52 (dd,  $J = 6.90$  Hz, 2.76 Hz, 2H), 7.45 (dd,  $J = 7.14$  Hz, 2.82 Hz, 2H), 7.26 (d,  $J = 3.12$  Hz, 2H), 6.61 (d,  $J = 3.12$  Hz, 2H);  $^{13}\text{C}$  NMR (151 MHz,  $\text{CDCl}_3$ )  $\delta$  ppm: 151.70, 150.30, 131.55, 127.49, 127.13, 123.60, 117.69, 113.83, 108.73; HRMS (APCI): calcd. for  $\text{C}_{18}\text{H}_8\text{Br}_2\text{N}_2\text{O}_2\text{S}$  [ $\text{M} + \text{H}$ ] $^+$  476.8751; found 476.7491.

**Synthesis of 8: 4** (163 mg, 0.46 mmol) was added into a 50 mL round bottom flask. THF (10 mL) was added as a solvent. NBS (207 mg, 1.16 mmol) was added to the reaction. The reaction was stirred under  $\text{N}_2$  atmosphere for 12 h. After completing, sodium thiosulphate was added to remove excess bromine and the reaction was extracted with dichloromethane (50 mL x 2). The combined organic phase was washed with water (50 mL x 2), dried over anhydrous  $\text{Na}_2\text{SO}_4$ , filtered, and evaporated to dryness. To obtain a product with higher purity, the residue was further purified by column chromatography eluting with mixture of dichloromethane and hexane (1:4) to obtain dark pink solid (56.2%).  $^1\text{H}$  NMR (600 MHz,  $\text{CDCl}_3$ )  $\delta$  ppm: 8.31 (dd,  $J = 10.14$  Hz, 3.78 Hz, 2H), 7.46 (dd,  $J = 10.14$  Hz, 4.02 Hz, 2H), 7.28 (d,  $J = 3.72$  Hz, 2H), 7.22 (d,  $J = 3.84$  Hz, 2H);  $^{13}\text{C}$  NMR (151 MHz,  $\text{CDCl}_3$ )  $\delta$  ppm: 151.37, 137.88, 132.86, 130.80, 130.19, 127.40, 126.72, 122.81, 115.07; HRMS (APCI): calcd. for  $\text{C}_{18}\text{H}_8\text{Br}_2\text{N}_2\text{S}_3$  [ $\text{M} + \text{H}$ ] $^+$  508.2640; found 508.8442.

MT01-79 product in CDCl3 +TMS  
 CP\_PROTON8 CDCl3 {C:\VISTEC NMR Data\VP} vpmt 5

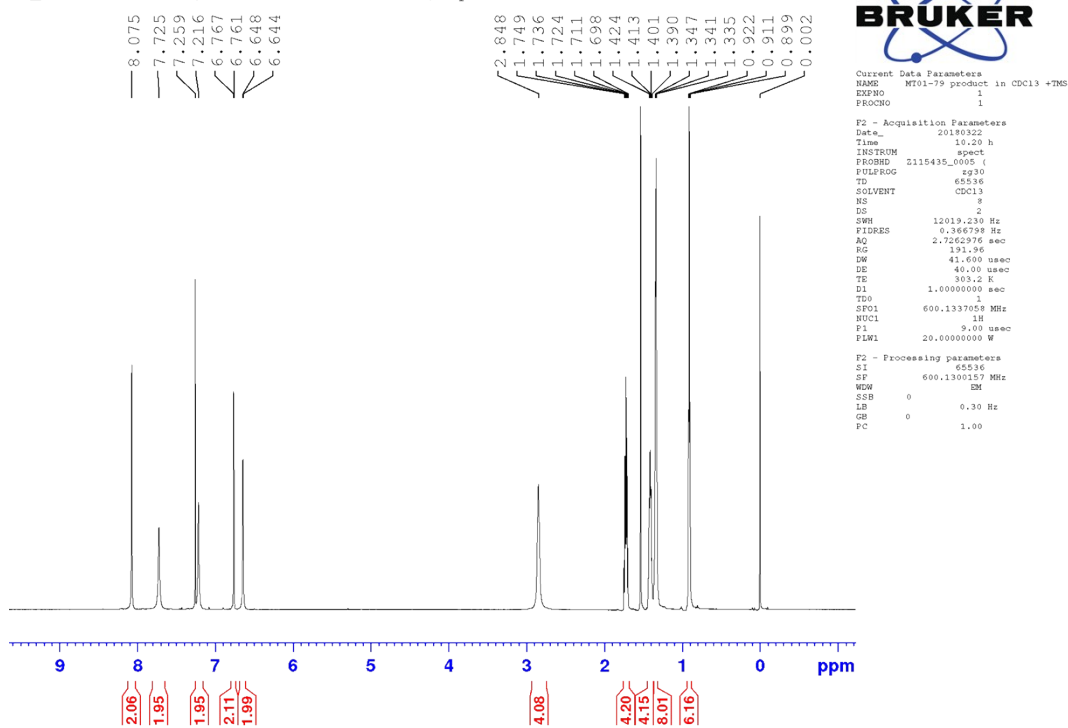

F-BT-F\_CNMR  
 CP\_C13CPD32\_DE12 CDCl3 {C:\VISTEC NMR Data\VP} vpmt 10

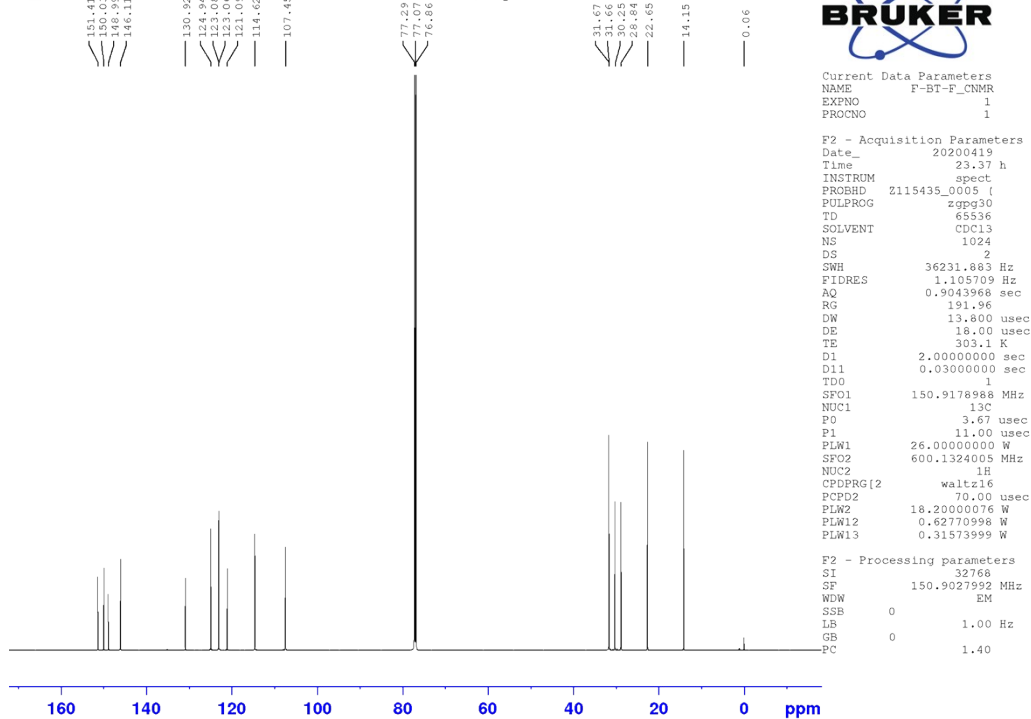

Fig. S1 <sup>1</sup>H-NMR and <sup>13</sup>C-NMR of F-BT-F.

T-BT-T\_20  
 CP\_PROTON8 CDC13 {C:\VISTEC NMR Data\VP} vpmt 7

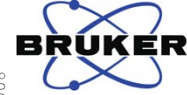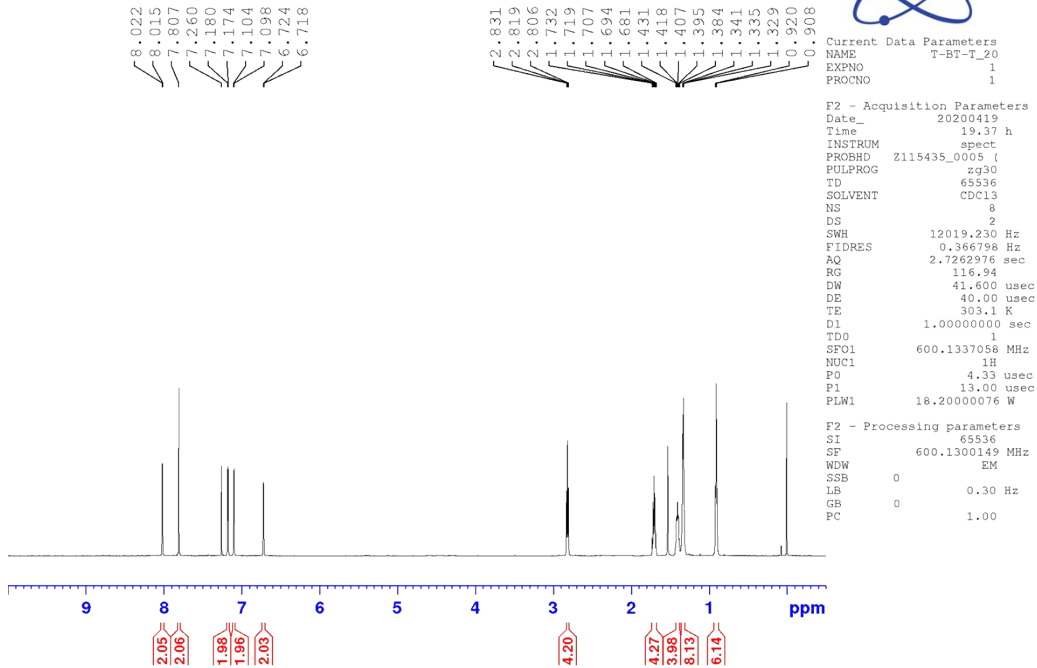

T-BT-T\_CNMR  
 CP\_C13CPD32\_DE12 CDC13 {C:\VISTEC NMR Data\VP} vpmt 7

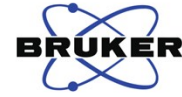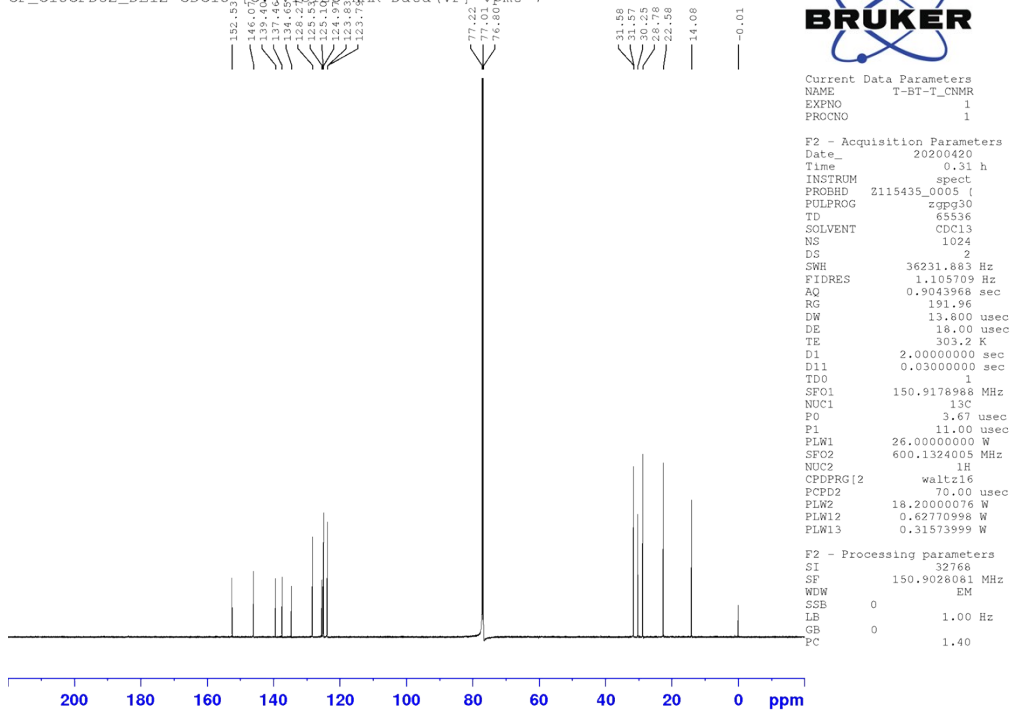

Fig. S2 <sup>1</sup>H-NMR and <sup>13</sup>C-NMR of T-BT-T.

MT01-73 product in ACETONE

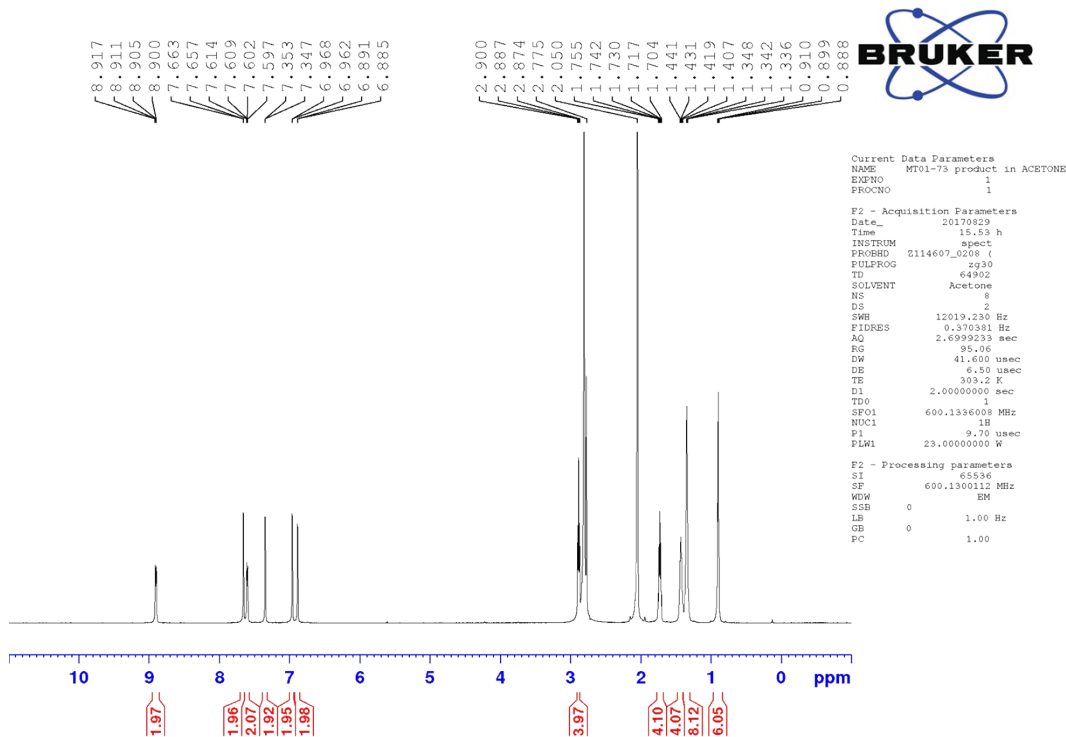

F-NT-F\_CNMR\_acetoneD6  
CP\_C13CPD32\_DE12 Acetone {C:\VISTEC NMR Data\VP} vpmt 8

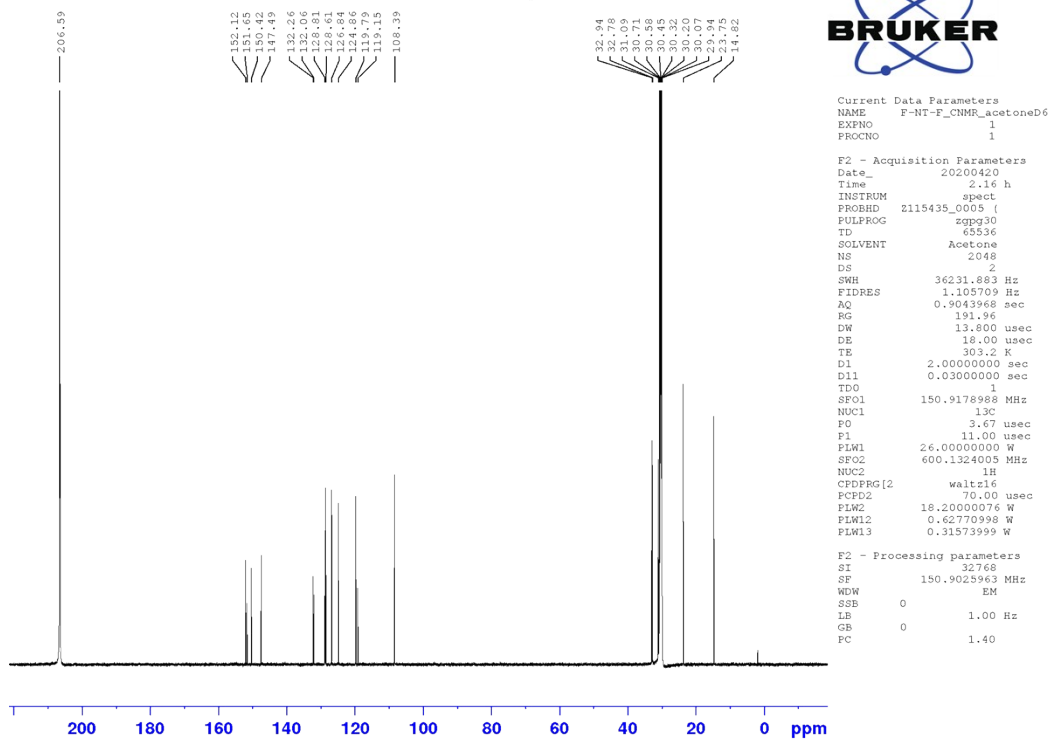

Fig. S3 <sup>1</sup>H-NMR and <sup>13</sup>C-NMR of F-NT-F.

T-NT-T\_20  
 CP\_PROTON8 CDC13 {C:\VISTEC NMR Data\VP} vpmt 9

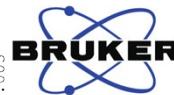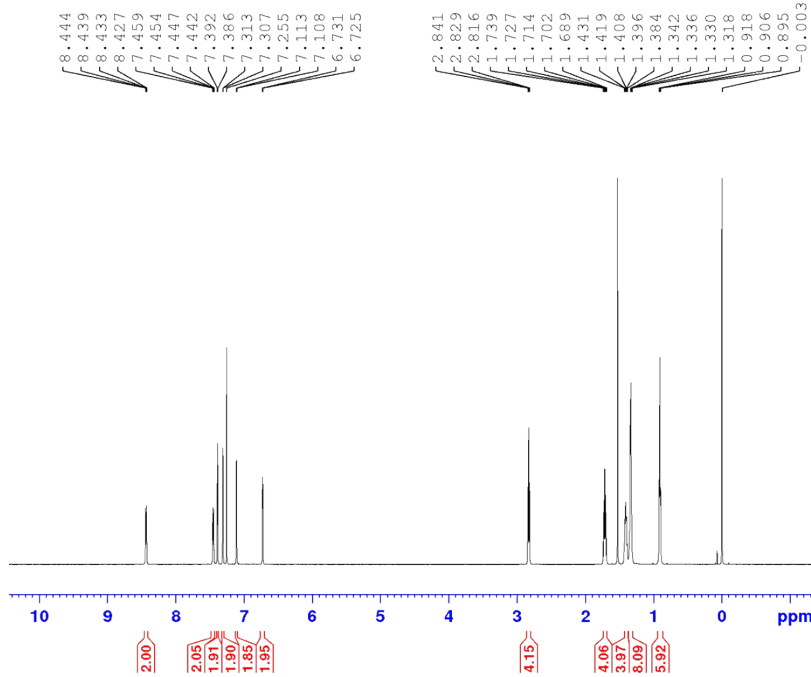

Current Data Parameters  
 NAME T-NT-T\_20  
 EXPNO 1  
 PROCNO 1

F2 - Acquisition Parameters  
 Date\_ 20200419  
 Time 19.44 h  
 INSTRUM spect  
 PROBHD Z115435\_0005 t  
 PULPROG zg30  
 TD 65536  
 SOLVENT CDC13  
 NS 8  
 DS 2  
 SWH 12019.230 Hz  
 FIDRES 0.366798 Hz  
 AQ 2.7262976 sec  
 RG 170.86  
 DW 41.600 usec  
 DE 40.00 usec  
 TE 303.2 K  
 D1 1.00000000 sec  
 TDO 1  
 SFO1 600.1337058 MHz  
 NUC1 1H  
 P0 4.33 usec  
 F1 13.00 usec  
 PLW1 18.20000076 W

F2 - Processing parameters  
 SI 65536  
 SF 600.1300179 MHz  
 WDW EM  
 SSB 0  
 LB 0.30 Hz  
 GB 0  
 PC 1.00

T-NT-T\_CNMR  
 CP\_C13CPD32\_DE12 CDC13 {C:\VISTEC NMR Data\VP} vpmt 9

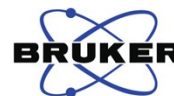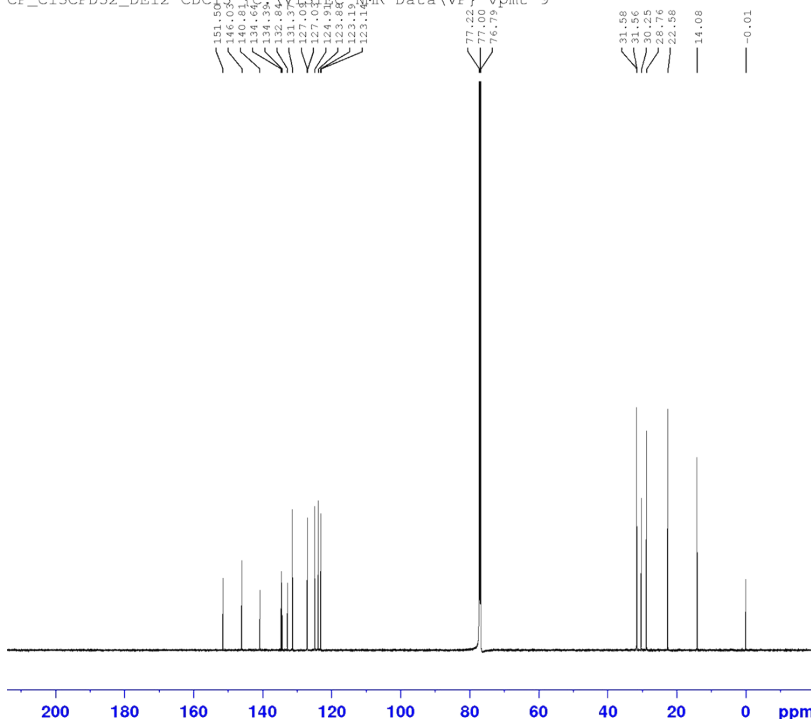

Current Data Parameters  
 NAME T-NT-T\_CNMR  
 EXPNO 1  
 PROCNO 1

F2 - Acquisition Parameters  
 Date\_ 20200419  
 Time 22.44 h  
 INSTRUM spect  
 PROBHD Z115435\_0005 t  
 PULPROG zgpg30  
 TD 65536  
 SOLVENT CDC13  
 NS 2048  
 DS 2  
 SWH 36231.883 Hz  
 FIDRES 1.105709 Hz  
 AQ 0.9043968 sec  
 RG 191.96  
 DW 13.800 usec  
 DE 18.00 usec  
 TE 303.1 K  
 D1 2.00000000 sec  
 D11 0.03000000 sec  
 TDO 1  
 SFO1 150.9178988 MHz  
 NUC1 13C  
 P0 3.67 usec  
 F1 11.00 usec  
 PLW1 26.00000000 W  
 SFO2 600.1324005 MHz  
 NUC2 1H  
 CPDPRG[2] waltz16  
 PCPD2 70.00 usec  
 PLW2 18.20000076 W  
 PLW12 0.62770998 W  
 PLW13 0.31573999 W

F2 - Processing parameters  
 SI 32768  
 SF 150.9028085 MHz  
 WDW EM  
 SSB 0  
 LB 1.00 Hz  
 GB 0  
 PC 1.40

Fig. S4 <sup>1</sup>H-NMR and <sup>13</sup>C-NMR of T-NT-T.

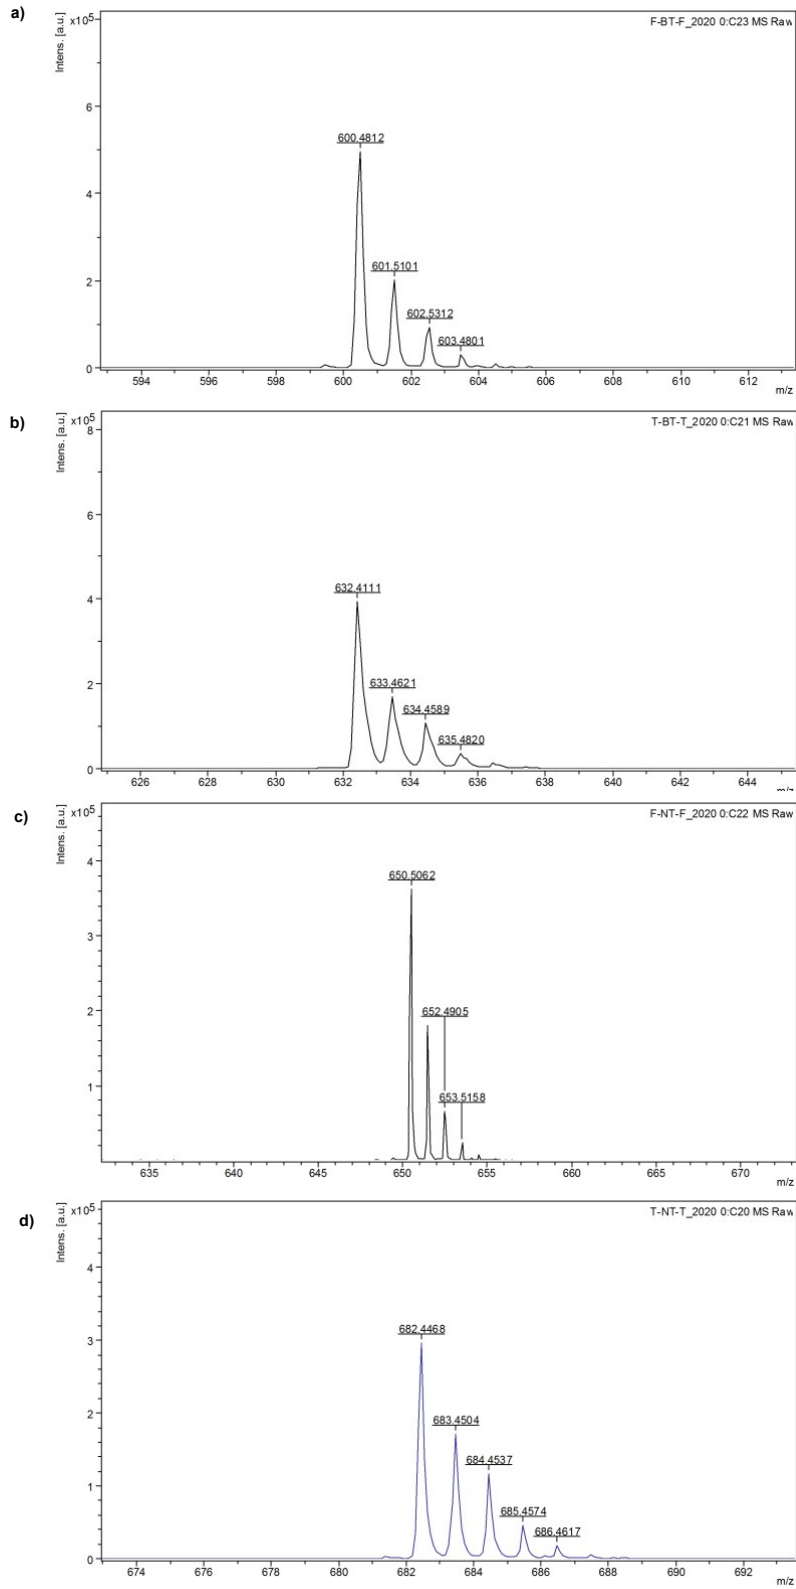

**Fig. S5** Mass spectra of a) F-BT-F, b) T-BT-T, c) F-NT-F, and d) T-NT-T.



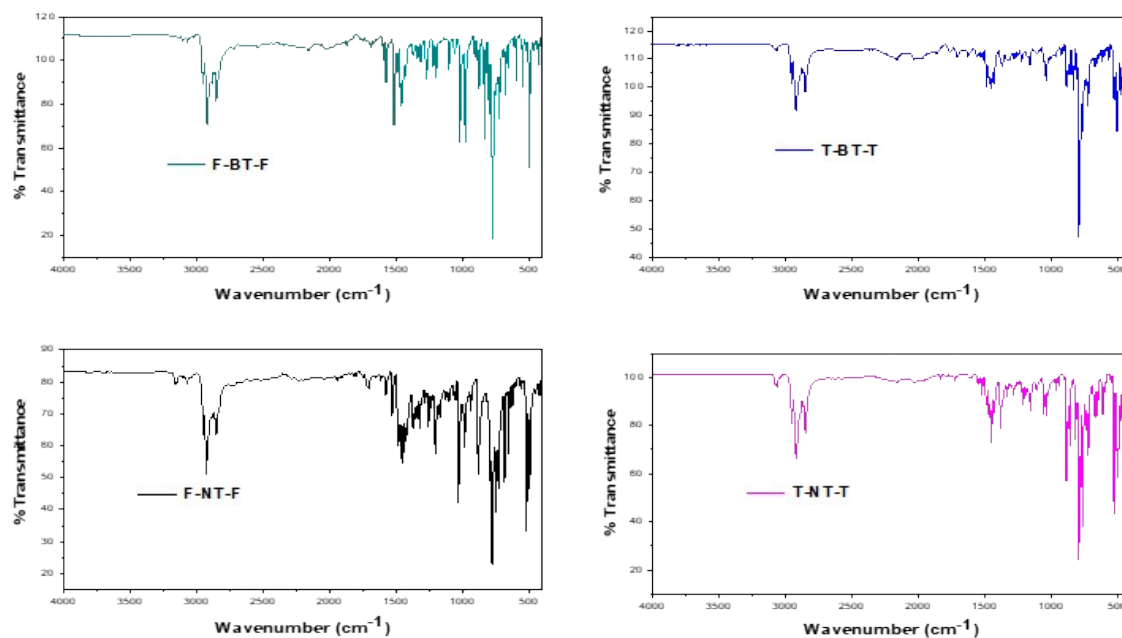

Fig. S6 FTIR graphs for all small molecules.

Table S1 Crystallographic data for F-NT-F and T-NT-T.

| Parameters                      | F-NT-F                                                                       | T-NT-T                                                        |
|---------------------------------|------------------------------------------------------------------------------|---------------------------------------------------------------|
| Formula                         | C <sub>38</sub> H <sub>38</sub> N <sub>2</sub> O <sub>2</sub> S <sub>3</sub> | C <sub>38</sub> H <sub>38</sub> N <sub>2</sub> S <sub>5</sub> |
| Formula Weight                  | 650.88                                                                       | 683.00                                                        |
| Crystal System                  | monoclinic                                                                   | triclinic                                                     |
| Space group                     | P2 <sub>1</sub> /n                                                           | P-1                                                           |
| a [Å]                           | 7.9181(8)                                                                    | 5.7829(6)                                                     |
| b [Å]                           | 25.263(2)                                                                    | 17.925(2)                                                     |
| c [Å]                           | 16.5549(17)                                                                  | 18.386(2)                                                     |
| α [°]                           | 90                                                                           | 67.293(4)                                                     |
| β [°]                           | 92.076(3)                                                                    | 82.493(4)                                                     |
| γ [°]                           | 90                                                                           | 84.393(4)                                                     |
| V [Å <sup>3</sup> ]             | 3309.4(5)                                                                    | 1740.7(3)                                                     |
| Z                               | 4                                                                            | 2                                                             |
| D(calc) [g/cm <sup>3</sup> ]    | 1.306                                                                        | 1.303                                                         |
| μ [mm <sup>-1</sup> ]           | 0.261                                                                        | 0.363                                                         |
| F (000)                         | 1376                                                                         | 720                                                           |
| Crystal Size [mm <sup>3</sup> ] | 0.15 x 0.36 x 0.48                                                           | 0.04 x 0.12 x 0.46                                            |
| Temperature [K]                 | 298                                                                          | 298                                                           |
| Radiation [Å]                   | 0.71073                                                                      | 0.71073                                                       |
| θ range [°]                     | 2.5 to 28.3                                                                  | 2.3 to 25.4                                                   |
| Total no. of reflections        | 72401                                                                        | 51986                                                         |
| Uniq. Data                      | 8215                                                                         | 6414                                                          |
| R <sub>int</sub>                | 0.075                                                                        | 0.088                                                         |
| Parameters                      | 409                                                                          | 409                                                           |
| R                               | 0.0443                                                                       | 0.0452                                                        |
| wR2                             | 0.1134                                                                       | 0.1021                                                        |
| Goodness to fit                 | 1.02                                                                         | 1.04                                                          |
| CCDC deposition number          | 1972793                                                                      | 1971452                                                       |

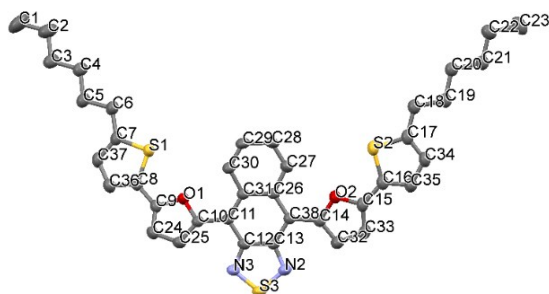

Fig. S7 Asymmetric Unit for F-NT-F.

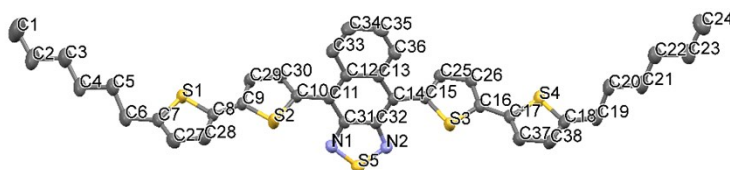

Fig. S8 Asymmetric Unit for T-NT-T.

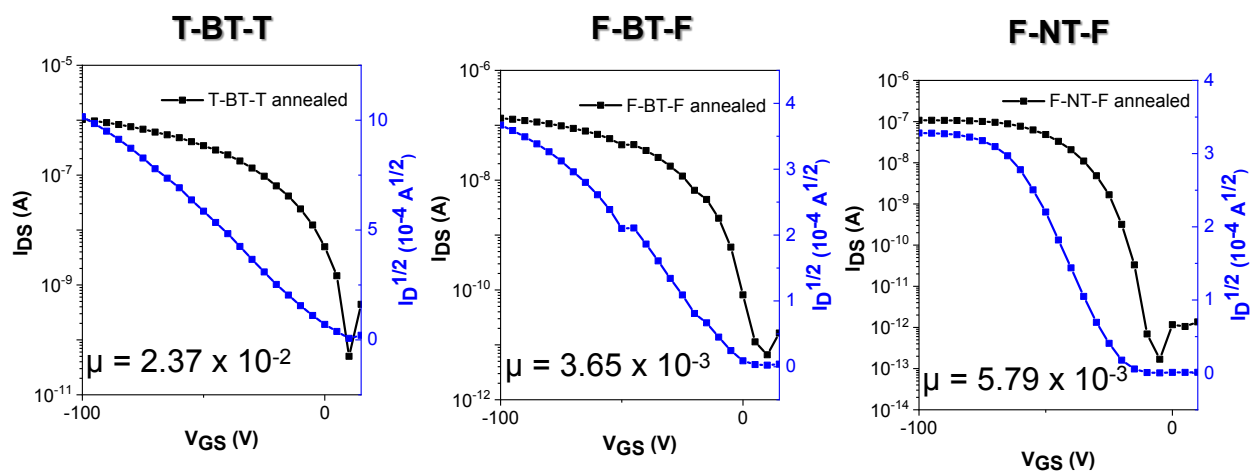

Fig. S9 Transfer curve of T-BT-T, F-BT-F, and F-NT-F annealed (100 °C 1 hr) devices.
